# Supplementary material for: Comparing lycopene's impact on mortality in adults with or without obesity
Source: Royal Society of Chemistry journal article supplement (doi:10.1039/d3fo04533a), 2024-01-01
Supplement: d3fo04533a1.pdf [file d3fo04533a1.pdf]

Supplementary Table S1 Comparison of baseline characteristics with and without mortality

| Characteristic              | Overall, N = 11737<br>(100%) | Alived, N = 10200<br>(87%) | All-cause mortality, N =<br>1537 (13%) | <i>P</i><br>value |
|-----------------------------|------------------------------|----------------------------|----------------------------------------|-------------------|
| Cycle                       |                              |                            |                                        | <0.001            |
| 2003-2004                   | 4,004.0 (34.1%)              | 3,123.0 (30.6%)            | 881.0 (57.3%)                          |                   |
| 2005-2006                   | 3,952.0 (33.7%)              | 3,352.0 (32.9%)            | 600.0 (39.0%)                          |                   |
| 2017-2018                   | 3,781.0 (32.2%)              | 3,725.0 (36.5%)            | 56.0 (3.6%)                            |                   |
| Age (years)                 | 45.00 (29.00, 62.00)         | 42.00 (28.00, 57.00)       | 72.00 (62.00, 80.00)                   | <0.001            |
| Sex (female)                | 5,731.0 (48.8%)              | 5,060.0 (49.6%)            | 671.0 (43.7%)                          | <0.001            |
| Race                        |                              |                            |                                        | <0.001            |
| Hispanic                    | 2,916.0 (24.8%)              | 2,645.0 (25.9%)            | 271.0 (17.6%)                          |                   |
| Non-Hispanic                | 8,821.0 (75.2%)              | 7,555.0 (74.1%)            | 1,266.0 (82.4%)                        |                   |
| Poverty                     | 2,195.0 (20.1%)              | 1,907.0 (20.1%)            | 288.0 (19.9%)                          | 0.8               |
| Smoking status              |                              |                            |                                        | <0.001            |
| Never smoker                | 5,829.0 (53.7%)              | 5,224.0 (56.0%)            | 605.0 (39.8%)                          |                   |
| Former smoker               | 2,650.0 (24.4%)              | 2,060.0 (22.1%)            | 590.0 (38.8%)                          |                   |
| Current smoker              | 2,368.0 (21.8%)              | 2,041.0 (21.9%)            | 327.0 (21.5%)                          |                   |
| Alcohol intake              |                              |                            |                                        | <0.001            |
| Non-drinker                 | 1,270.0 (22.4%)              | 1,026.0 (20.1%)            | 244.0 (44.0%)                          |                   |
| Quit drinker                | 1,345.0 (23.7%)              | 1,143.0 (22.4%)            | 202.0 (36.5%)                          |                   |
| Current drinker             | 3,052.0 (53.9%)              | 2,944.0 (57.6%)            | 108.0 (19.5%)                          |                   |
| Educational attainment      |                              |                            |                                        | <0.001            |
| Below high school           | 1,222.0 (10.4%)              | 889.0 (8.7%)               | 333.0 (21.7%)                          |                   |
| High school                 | 4,827.0 (41.2%)              | 4,146.0 (40.7%)            | 681.0 (44.4%)                          |                   |
| Above high school           | 5,678.0 (48.4%)              | 5,159.0 (50.6%)            | 519.0 (33.9%)                          |                   |
| Hypertension                | 4,570.0 (40.0%)              | 3,505.0 (35.3%)            | 1,065.0 (71.8%)                        | <0.001            |
| Diabetes                    | 1,653.0 (25.8%)              | 1,219.0 (22.4%)            | 434.0 (45.8%)                          | <0.001            |
| BMI                         | 27.70 (24.02, 32.30)         | 27.70 (24.01, 32.40)       | 27.59 (24.11, 31.72)                   | 0.2               |
| Waist circumference<br>(cm) | 97.90 ± 16.45                | 97.42 ± 16.62              | 101.19 ± 14.76                         | <0.001            |
| Waist-to-hip ratio          | 0.93 ± 0.08                  | 0.93 ± 0.08                | 0.97 ± 0.07                            | <0.001            |
| SBP (mmHg)                  | 121.00 (111.00,<br>134.00)   | 119.00 (110.00,<br>131.00) | 134.00 (121.00, 149.00)                | <0.001            |
| DBP (mmHg)                  | 71.00 (63.00, 78.00)         | 71.00 (63.00, 78.00)       | 67.00 (59.00, 76.00)                   | <0.001            |
| Glucose (mmol/L)            | 5.50 (5.11, 6.02)            | 5.44 (5.06, 5.94)          | 5.72 (5.22, 6.71)                      | <0.001            |
| HbA1c (%)                   | 5.40 (5.10, 5.70)            | 5.40 (5.10, 5.70)          | 5.60 (5.30, 6.10)                      | <0.001            |
| TG (mmol/L)                 | 1.30 (0.88, 1.94)            | 1.28 (0.87, 1.92)          | 1.48 (1.02, 2.15)                      | <0.001            |
| TC (mmol/L)                 | 4.91 (4.24, 5.66)            | 4.89 (4.24, 5.64)          | 5.07 (4.34, 5.84)                      | <0.001            |

| <b>Characteristic</b>                   | <b>Overall, N = 11737<br/>(100%)</b> | <b>Alived, N = 10200<br/>(87%)</b> | <b>All-cause mortality, N =<br/>1537 (13%)</b> | <b>P<br/>value</b> |
|-----------------------------------------|--------------------------------------|------------------------------------|------------------------------------------------|--------------------|
| HDL-C (mmol/L)                          | 1.32 (1.09, 1.60)                    | 1.32 (1.09, 1.60)                  | 1.32 (1.09, 1.60)                              | 0.3                |
| LDL-C (mmol/L)                          | 2.90 ± 0.94                          | 2.90 ± 0.92                        | 2.95 ± 1.08                                    | 0.2                |
| Creatinine (μmol/L)                     | 79.56 (64.53, 88.40)                 | 76.91 (62.76, 88.40)               | 88.40 (70.72, 106.08)                          | <0.001             |
| Albumin (g/L)                           | 42.00 (40.00, 44.00)                 | 42.00 (40.00, 44.00)               | 41.00 (39.00, 43.00)                           | <0.001             |
| CRP (mg/dL)                             | 0.19 (0.08, 0.45)                    | 0.18 (0.07, 0.43)                  | 0.27 (0.13, 0.58)                              | <0.001             |
| Total lycopene (μg/dL)                  | 38.40 (26.60, 52.20)                 | 39.60 (28.00, 53.30)               | 29.56 (18.70, 43.00)                           | <0.001             |
| Dietary lycopene intake<br>(μg/day)     | 2,580.00 (580.00,<br>7,238.50)       | 2,743.75 (674.13,<br>7,378.88)     | 1,600.50 (257.50,<br>5,715.50)                 | <0.001             |
| Total calories(kcal/day)                | 1,959.00 (1,478.00,<br>2,575.00)     | 2,009.75 (1,518.50,<br>2,637.00)   | 1,664.50 (1,284.00,<br>2,146.00)               | <0.001             |
| Dietary total protein<br>intake (g/day) | 74.94 (55.61, 99.52)                 | 76.63 (56.72,<br>101.38)           | 63.73 (49.49, 84.98)                           | <0.001             |
| Dietary total fat intake<br>(g/day)     | 73.85 (51.83,<br>101.35)             | 76.00 (53.54,<br>103.79)           | 60.84 (43.67, 82.97)                           | <0.001             |
| Dietary cholesterol<br>intake (mg/day)  | 249.50 (155.50,<br>386.50)           | 253.00 (158.00,<br>392.00)         | 227.00 (140.00, 354.50)                        | <0.001             |
| Dietary fiber intake<br>(g/day)         | 14.20 (9.80, 19.95)                  | 14.35 (9.90, 20.25)                | 13.30 (9.15, 18.15)                            | <0.001             |
| Survival length (months)                | 162.00 (31.00,<br>182.00)            | 166.00 (29.00,<br>185.00)          | 97.00 (54.00, 141.00)                          | <0.001             |

BMI: body mass index, CRP: C-reactive protein, DBP: diastolic blood pressure, HbA1c: glycohemoglobin, HDL-C: high-density lipoprotein cholesterol, LDL-C: low-density lipoprotein cholesterol, SBP: systolic blood pressure, TC: total cholesterol, TG: triglycerides. Normally distributed continuous variables are described as mean ± SD, and continuous variables without a normal distribution are presented as median (Q25, Q75). Categorical variables are presented as numbers (percentages).

Supplementary Table S2 Characteristics of Adults According to Quartiles of Serum Lycopene

| Characteristic           | Lycopene                      | Lycopene                      | Lycopene                      | Lycopene                      | P value |
|--------------------------|-------------------------------|-------------------------------|-------------------------------|-------------------------------|---------|
|                          | Quantile 1, N =<br>2952 (25%) | Quantile 2, N =<br>2925 (25%) | Quantile 3, N =<br>2933 (25%) | Quantile 4, N =<br>2927 (25%) |         |
| Cycle                    |                               |                               |                               |                               | <0.001  |
| 2003-2004                | 1,051.0 (35.6%)               | 960.0 (32.8%)                 | 1,013.0 (34.5%)               | 980.0 (33.5%)                 |         |
| 2005-2006                | 818.0 (27.7%)                 | 971.0 (33.2%)                 | 992.0 (33.8%)                 | 1,171.0 (40.0%)               |         |
| 2017-2018                | 1,083.0 (36.7%)               | 994.0 (34.0%)                 | 928.0 (31.6%)                 | 776.0 (26.5%)                 |         |
| Age (years)              | 57.00 (38.00,<br>70.00)       | 45.00 (29.00,<br>62.00)       | 41.00 (28.00,<br>58.00)       | 41.00 (27.00,<br>55.00)       | <0.001  |
| Sex (female)             | 1,566.0 (53.0%)               | 1,512.0 (51.7%)               | 1,400.0 (47.7%)               | 1,253.0 (42.8%)               | <0.001  |
| Race                     |                               |                               |                               |                               | <0.001  |
| Hispanic                 | 765.0 (25.9%)                 | 867.0 (29.6%)                 | 726.0 (24.8%)                 | 558.0 (19.1%)                 |         |
| Non-Hispanic             | 2,187.0 (74.1%)               | 2,058.0 (70.4%)               | 2,207.0 (75.2%)               | 2,369.0 (80.9%)               |         |
| Poverty                  | 597.0 (22.0%)                 | 588.0 (21.6%)                 | 528.0 (19.3%)                 | 482.0 (17.6%)                 | <0.001  |
| Smoking status           |                               |                               |                               |                               | 0.002   |
| Never smoker             | 1,409.0 (50.1%)               | 1,471.0 (54.5%)               | 1,492.0 (55.7%)               | 1,457.0 (54.9%)               |         |
| Former smoker            | 779.0 (27.7%)                 | 647.0 (24.0%)                 | 643.0 (24.0%)                 | 581.0 (21.9%)                 |         |
| Current smoker           | 625.0 (22.2%)                 | 582.0 (21.6%)                 | 546.0 (20.4%)                 | 615.0 (23.2%)                 |         |
| Alcohol intake           |                               |                               |                               |                               | <0.001  |
| Non-drinker              | 407.0 (25.1%)                 | 313.0 (21.5%)                 | 265.0 (19.5%)                 | 285.0 (23.3%)                 |         |
| Quit drinker             | 459.0 (28.3%)                 | 306.0 (21.0%)                 | 312.0 (22.9%)                 | 268.0 (21.9%)                 |         |
| Current drinker          | 757.0 (46.6%)                 | 839.0 (57.5%)                 | 784.0 (57.6%)                 | 672.0 (54.9%)                 |         |
| Educational attainment   |                               |                               |                               |                               | <0.001  |
| Below high school        | 488.0 (16.6%)                 | 333.0 (11.4%)                 | 243.0 (8.3%)                  | 158.0 (5.4%)                  |         |
| High school              | 1,272.0 (43.1%)               | 1,236.0 (42.3%)               | 1,151.0 (39.3%)               | 1,168.0 (40.0%)               |         |
| Above high school        | 1,188.0 (40.3%)               | 1,356.0 (46.4%)               | 1,537.0 (52.4%)               | 1,597.0 (54.6%)               |         |
| Hypertension             | 1,449.0 (50.5%)               | 1,141.0 (40.1%)               | 1,011.0 (35.4%)               | 969.0 (33.9%)                 | <0.001  |
| Diabetes                 | 615.0 (36.2%)                 | 423.0 (25.6%)                 | 339.0 (22.2%)                 | 276.0 (18.2%)                 | <0.001  |
| BMI                      | 28.04 (24.20,<br>33.15)       | 27.93 (23.99,<br>32.70)       | 27.40 (23.83,<br>32.04)       | 27.41 (24.09,<br>31.47)       | <0.001  |
| Waist circumference (cm) | 100.11 ± 17.01                | 98.14 ± 16.66                 | 96.92 ± 16.49                 | 96.44 ± 15.35                 | <0.001  |
| Waist-to-hip ratio       | 0.94 ± 0.08                   | 0.94 ± 0.08                   | 0.93 ± 0.08                   | 0.93 ± 0.08                   | 0.001   |
| SBP (mmHg)               | 125.00 (113.00,<br>139.00)    | 121.00 (111.00,<br>135.00)    | 119.00 (110.00,<br>131.00)    | 120.00 (111.00,<br>131.00)    | <0.001  |
| DBP (mmHg)               | 69.00 (62.00,<br>77.00)       | 71.00 (63.00,<br>78.00)       | 71.00 (63.00,<br>78.00)       | 71.00 (64.00,<br>79.00)       | <0.001  |
| Glucose (mmol/L)         | 5.66 (5.20, 6.38)             | 5.50 (5.11, 6.05)             | 5.40 (5.05, 5.91)             | 5.38 (5.01, 5.83)             | <0.001  |
| HbA1c (%)                | 5.50 (5.20, 5.90)             | 5.40 (5.10, 5.80)             | 5.40 (5.10, 5.70)             | 5.40 (5.10, 5.70)             | <0.001  |
| TG (mmol/L)              | 1.33 (0.90, 1.92)             | 1.29 (0.87, 1.95)             | 1.24 (0.85, 1.87)             | 1.33 (0.91, 2.05)             | <0.001  |
| TC (mmol/L)              | 4.55 (3.88, 5.28)             | 4.71 (4.11, 5.46)             | 4.97 (4.34, 5.66)             | 5.38 (4.76, 6.10)             | <0.001  |
| HDL-C (mmol/L)           | 1.27 (1.06, 1.55)             | 1.29 (1.06, 1.58)             | 1.34 (1.11, 1.63)             | 1.34 (1.11, 1.66)             | <0.001  |

| Characteristic                       | Lycopene                         | Lycopene                         | Lycopene                         | Lycopene                          | P value |
|--------------------------------------|----------------------------------|----------------------------------|----------------------------------|-----------------------------------|---------|
|                                      | Quantile 1, N =<br>2952 (25%)    | Quantile 2, N =<br>2925 (25%)    | Quantile 3, N =<br>2933 (25%)    | Quantile 4, N =<br>2927 (25%)     |         |
| LDL-C (mmol/L)                       | 2.57 ± 0.94                      | 2.75 ± 0.86                      | 2.98 ± 0.88                      | 3.32 ± 0.92                       | <0.001  |
| Creatinine (μmol/L)                  | 77.79 (62.76,<br>89.28)          | 77.79 (61.88,<br>88.40)          | 79.56 (66.30,<br>88.40)          | 79.56 (70.72,<br>89.28)           | <0.001  |
| Albumin (g/L)                        | 41.00 (39.00,<br>44.00)          | 42.00 (40.00,<br>44.00)          | 42.00 (40.00,<br>44.00)          | 42.00 (40.00,<br>45.00)           | <0.001  |
| CRP (mg/dL)                          | 0.25 (0.10, 0.57)                | 0.19 (0.08, 0.46)                | 0.18 (0.07, 0.41)                | 0.16 (0.07, 0.36)                 | <0.001  |
| Dietary lycopene intake (μg/day)     | 1,243.50 (78.50,<br>4,097.63)    | 2,205.50 (514.50,<br>6,367.00)   | 3,273.00 (943.50,<br>7,866.00)   | 4,522.00 (1,404.00,<br>10,603.00) | <0.001  |
| Total calories(kcal/day)             | 1,782.25 (1,357.38,<br>2,321.88) | 1,946.00 (1,465.50,<br>2,530.50) | 2,027.00 (1,528.00,<br>2,680.50) | 2,114.00 (1,596.25,<br>2,771.25)  | <0.001  |
| Dietary total protein intake (g/day) | 67.82 (51.04,<br>89.93)          | 74.57 (55.54,<br>98.92)          | 77.19 (57.55,<br>102.09)         | 81.35 (59.70,<br>107.25)          | <0.001  |
| Dietary total fat intake (g/day)     | 65.44 (46.68,<br>89.39)          | 72.98 (50.88,<br>99.10)          | 77.75 (54.12,<br>106.03)         | 79.44 (57.12,<br>110.02)          | <0.001  |
| Dietary cholesterol intake (mg/day)  | 238.00 (143.50,<br>372.25)       | 238.50 (153.50,<br>383.50)       | 256.00 (159.50,<br>390.00)       | 265.00 (163.00,<br>399.00)        | <0.001  |
| Dietary fiber intake (g/day)         | 13.30 (8.85,<br>19.25)           | 14.15 (9.70,<br>20.00)           | 14.60 (10.30,<br>20.30)          | 14.75 (10.43,<br>20.25)           | <0.001  |
| All-cause mortality                  | 668.0 (22.6%)                    | 365.0 (12.5%)                    | 289.0 (9.9%)                     | 215.0 (7.3%)                      | <0.001  |
| Cardiovascular mortality             | 191.0 (6.5%)                     | 102.0 (3.5%)                     | 88.0 (3.0%)                      | 62.0 (2.1%)                       | <0.001  |
| Survival length (months)             | 109.00 (28.00,<br>177.25)        | 161.00 (29.00,<br>182.00)        | 165.00 (32.00,<br>184.00)        | 167.00 (34.00,<br>183.00)         | <0.001  |

BMI: body mass index, CRP: C-reactive protein, DBP: diastolic blood pressure, HbA1c: glycohemoglobin, HDL-C: high-density lipoprotein cholesterol, LDL-C: low-density lipoprotein cholesterol, SBP: systolic blood pressure, TC: total cholesterol, TG: triglycerides. Normally distributed continuous variables are described as mean ± SD, and continuous variables without a normal distribution are presented as median (Q25, Q75). Categorical variables are presented as numbers (percentages).

Supplementary Table S3 Characteristics of Adults According to Quartiles of Dietary Lycopene Intake

| Characteristic           | Dietary Lycopene Quantile 1, N = 2937 (25%) | Dietary Lycopene Quantile 2, N = 2932 (25%) | Dietary Lycopene Quantile 3, N = 2934 (25%) | Dietary Lycopene Quantile 4, N = 2934 (25%) | P value |
|--------------------------|---------------------------------------------|---------------------------------------------|---------------------------------------------|---------------------------------------------|---------|
| Cycle                    |                                             |                                             |                                             |                                             | <0.001  |
| 2003-2004                | 945.0 (32.2%)                               | 929.0 (31.7%)                               | 968.0 (33.0%)                               | 1,162.0 (39.6%)                             |         |
| 2005-2006                | 977.0 (33.3%)                               | 972.0 (33.2%)                               | 1,027.0 (35.0%)                             | 976.0 (33.3%)                               |         |
| 2017-2018                | 1,015.0 (34.6%)                             | 1,031.0 (35.2%)                             | 939.0 (32.0%)                               | 796.0 (27.1%)                               |         |
| Age (years)              | 52.00 (33.00, 66.00)                        | 47.00 (31.00, 63.00)                        | 43.00 (28.00, 60.00)                        | 41.00 (27.00, 58.00)                        | <0.001  |
| Sex (female)             | 1,523.0 (51.9%)                             | 1,561.0 (53.2%)                             | 1,455.0 (49.6%)                             | 1,192.0 (40.6%)                             | <0.001  |
| Race                     |                                             |                                             |                                             |                                             | <0.001  |
| Hispanic                 | 571.0 (19.4%)                               | 708.0 (24.1%)                               | 839.0 (28.6%)                               | 798.0 (27.2%)                               |         |
| Non-Hispanic             | 2,366.0 (80.6%)                             | 2,224.0 (75.9%)                             | 2,095.0 (71.4%)                             | 2,136.0 (72.8%)                             |         |
| Poverty                  | 590.0 (21.7%)                               | 563.0 (20.8%)                               | 522.0 (19.1%)                               | 520.0 (18.9%)                               | 0.024   |
| Smoking status           |                                             |                                             |                                             |                                             | 0.029   |
| Never smoker             | 1,423.0 (51.8%)                             | 1,507.0 (55.1%)                             | 1,475.0 (54.5%)                             | 1,424.0 (53.5%)                             |         |
| Former smoker            | 681.0 (24.8%)                               | 677.0 (24.8%)                               | 646.0 (23.9%)                               | 646.0 (24.3%)                               |         |
| Current smoker           | 642.0 (23.4%)                               | 551.0 (20.1%)                               | 583.0 (21.6%)                               | 592.0 (22.2%)                               |         |
| Alcohol intake           |                                             |                                             |                                             |                                             | <0.001  |
| Non-drinker              | 381.0 (24.2%)                               | 319.0 (21.2%)                               | 313.0 (22.7%)                               | 257.0 (21.3%)                               |         |
| Quit drinker             | 439.0 (27.8%)                               | 370.0 (24.6%)                               | 288.0 (20.9%)                               | 248.0 (20.5%)                               |         |
| Current drinker          | 757.0 (48.0%)                               | 816.0 (54.2%)                               | 775.0 (56.3%)                               | 704.0 (58.2%)                               |         |
| Educational attainment   |                                             |                                             |                                             |                                             | <0.001  |
| Below high school        | 374.0 (12.7%)                               | 313.0 (10.7%)                               | 274.0 (9.3%)                                | 261.0 (8.9%)                                |         |
| High school              | 1,258.0 (42.9%)                             | 1,175.0 (40.1%)                             | 1,217.0 (41.5%)                             | 1,177.0 (40.1%)                             |         |
| Above high school        | 1,303.0 (44.4%)                             | 1,440.0 (49.2%)                             | 1,441.0 (49.1%)                             | 1,494.0 (51.0%)                             |         |
| Hypertension             | 1,291.0 (44.9%)                             | 1,176.0 (41.4%)                             | 1,075.0 (37.7%)                             | 1,028.0 (36.0%)                             | <0.001  |
| Diabetes                 | 511.0 (30.7%)                               | 443.0 (28.0%)                               | 364.0 (23.1%)                               | 335.0 (21.2%)                               | <0.001  |
| BMI                      | 27.74 (24.07, 32.61)                        | 28.00 (24.18, 32.86)                        | 27.50 (23.91, 31.90)                        | 27.63 (23.96, 31.91)                        | 0.005   |
| Waist circumference (cm) | 98.50 ± 16.78                               | 98.49 ± 16.49                               | 96.99 ± 16.13                               | 97.61 ± 16.33                               | <0.001  |
| Waist-to-hip ratio       | 0.94 ± 0.08                                 | 0.93 ± 0.08                                 | 0.93 ± 0.08                                 | 0.93 ± 0.08                                 | 0.4     |
| SBP (mmHg)               | 123.00 (112.00, 137.00)                     | 121.00 (111.00, 135.00)                     | 120.00 (111.00, 133.00)                     | 120.00 (111.00, 131.00)                     | <0.001  |
| DBP (mmHg)               | 71.00 (63.00, 78.00)                        | 71.00 (63.00, 78.00)                        | 71.00 (63.00, 78.00)                        | 71.00 (63.00, 78.00)                        | 0.7     |
| Glucose (mmol/L)         | 5.51 (5.11, 6.16)                           | 5.50 (5.11, 6.05)                           | 5.44 (5.05, 6.00)                           | 5.45 (5.08, 5.94)                           | <0.001  |
| HbA1c (%)                | 5.50 (5.20, 5.80)                           | 5.40 (5.20, 5.80)                           | 5.40 (5.10, 5.70)                           | 5.40 (5.10, 5.70)                           | <0.001  |

| Characteristic                          | Dietary                             | Dietary                             | Dietary                             | Dietary                             | P value |
|-----------------------------------------|-------------------------------------|-------------------------------------|-------------------------------------|-------------------------------------|---------|
|                                         | Lycopene                            | Lycopene                            | Lycopene                            | Lycopene                            |         |
|                                         | Quantile 1, N =<br>2937 (25%)       | Quantile 2, N =<br>2932 (25%)       | Quantile 3, N =<br>2934 (25%)       | Quantile 4, N =<br>2934 (25%)       |         |
| TG (mmol/L)                             | 1.29 (0.88, 1.91)                   | 1.31 (0.89, 1.94)                   | 1.28 (0.88, 1.91)                   | 1.32 (0.89, 2.00)                   | 0.2     |
| TC (mmol/L)                             | 4.91 (4.22, 5.72)                   | 4.91 (4.27, 5.69)                   | 4.91 (4.22, 5.64)                   | 4.89 (4.24, 5.66)                   | 0.4     |
| HDL-C (mmol/L)                          | 1.32 (1.09, 1.60)                   | 1.32 (1.09, 1.60)                   | 1.32 (1.11, 1.60)                   | 1.29 (1.06, 1.58)                   | 0.002   |
| LDL-C (mmol/L)                          | 2.90 ± 0.96                         | 2.91 ± 0.95                         | 2.89 ± 0.95                         | 2.91 ± 0.91                         | >0.9    |
| Creatinine (µmol/L)                     | 79.56 (66.30,<br>95.47)             | 79.56 (63.65,<br>88.40)             | 76.91 (62.10,<br>88.40)             | 79.56 (67.18,<br>88.40)             | <0.001  |
| Albumin (g/L)                           | 41.00 (39.00,<br>44.00)             | 42.00 (39.00,<br>44.00)             | 42.00 (40.00,<br>44.00)             | 43.00 (40.00,<br>45.00)             | <0.001  |
| CRP (mg/dL)                             | 0.21 (0.09, 0.48)                   | 0.20 (0.09, 0.49)                   | 0.19 (0.08, 0.42)                   | 0.17 (0.07, 0.40)                   | <0.001  |
| Serum<br>lycopene(µg/dL)                | 31.40 (20.90,<br>43.33)             | 36.70 (25.60,<br>49.42)             | 40.50 (28.83,<br>53.10)             | 45.60 (33.53,<br>59.85)             | <0.001  |
| Total<br>calories(kcal/day)             | 1,668.50<br>(1,283.50,<br>2,210.00) | 1,829.50<br>(1,393.88,<br>2,347.88) | 2,015.25<br>(1,564.00,<br>2,627.38) | 2,378.00<br>(1,840.38,<br>3,020.63) | <0.001  |
| Dietary total protein<br>intake (g/day) | 64.47 (48.21,<br>87.30)             | 70.02 (52.81,<br>92.86)             | 76.57 (57.78,<br>100.33)            | 89.41 (68.27,<br>115.73)            | <0.001  |
| Dietary total fat<br>intake (g/day)     | 61.55 (43.97,<br>87.36)             | 69.09 (50.00,<br>93.64)             | 76.99 (54.69,<br>104.33)            | 87.94 (64.51,<br>118.71)            | <0.001  |
| Dietary cholesterol<br>intake (mg/day)  | 223.00 (135.00,<br>358.00)          | 238.50 (149.50,<br>375.13)          | 252.75 (158.50,<br>389.38)          | 283.00 (181.13,<br>424.50)          | <0.001  |
| Dietary fiber intake<br>(g/day)         | 11.40 (7.60,<br>16.80)              | 13.00 (9.04,<br>18.20)              | 14.53 (10.50,<br>19.85)             | 18.00 (13.00,<br>24.09)             | <0.001  |
| All-cause mortality                     | 515.0 (17.5%)                       | 393.0 (13.4%)                       | 326.0 (11.1%)                       | 303.0 (10.3%)                       | <0.001  |
| Cardiovascular<br>mortality             | 157.0 (5.3%)                        | 104.0 (3.5%)                        | 101.0 (3.4%)                        | 81.0 (2.8%)                         | <0.001  |
| Survival length<br>(months)             | 157.00 (28.00,<br>178.00)           | 160.00 (29.00,<br>180.00)           | 164.00 (30.00,<br>182.00)           | 168.00 (34.00,<br>186.00)           | <0.001  |

BMI: body mass index, CRP: C-reactive protein, DBP: diastolic blood pressure, HbA1c: glycohemoglobin, HDL-C: high-density lipoprotein cholesterol, LDL-C: low-density lipoprotein cholesterol, SBP: systolic blood pressure, TC: total cholesterol, TG: triglycerides. Normally distributed continuous variables are described as mean ± SD, and continuous variables without a normal distribution are presented as median (Q25, Q75). Categorical variables are presented as numbers (percentages).

Supplementary Table S4 Result of testing the proportional hazards assumption for multi-factor Cox regression models.

| Model                | All-cause mortality  |                |          | Cardiovascular mortality |                |          |
|----------------------|----------------------|----------------|----------|--------------------------|----------------|----------|
|                      | Variables            | chisq          | <i>P</i> | Variables                | chisq          | <i>P</i> |
| Model 1              | Serum lycopene       | 4.11           | 0.04     | Serum lycopene           | 0.59           | 0.44     |
|                      | Sex                  | 4.81           | 0.03     | Sex                      | <0.01          | 0.95     |
|                      | Age                  | 0.14           | 0.71     | Age                      | 0.16           | 0.69     |
|                      | Race                 | 0.26           | 0.61     | Race                     | 1.14           | 0.29     |
|                      | Global               | 9.73           | 0.05     | Global                   | 1.93           | 0.75     |
|                      | Model 2              | Serum lycopene | 7.82     | 0.01                     | Serum lycopene | 1.00     |
| Sex                  |                      | 3.24           | 0.07     | Sex                      | 0.19           | 0.66     |
| Age                  |                      | 0.66           | 0.42     | Age                      | 0.56           | 0.46     |
| Race                 |                      | 5.37           | 0.02     | Race                     | 6.51           | 0.01     |
| Poverty              |                      | 1.81           | 0.18     | Poverty                  | 0.02           | 0.89     |
| Education attainment |                      | 2.61           | 0.27     | Education attainment     | 3.45           | 0.18     |
| Smoking status       |                      | 5.89           | 0.05     | Smoking status           | 4.92           | 0.09     |
| Alcoholic intake     |                      | 2.43           | 0.12     | Alcoholic intake         | 0.07           | 0.79     |
| Physical activity    |                      | 4.54           | 0.03     | Physical activity        | 3.03           | 0.08     |
| Total calories       |                      | 0.17           | 0.68     | Total calories           | 1.32           | 0.25     |
| Global               |                      | 26.91          | 0.01     | Global                   | 17.59          | 0.13     |
| Model 3              | Serum lycopene       | 7.98           | <0.01    | Serum lycopene           | 1.11           | 0.29     |
|                      | Sex                  | 3.33           | 0.07     | Sex                      | 0.14           | 0.71     |
|                      | Age                  | 1.03           | 0.31     | Age                      | 1.24           | 0.27     |
|                      | Race                 | 4.32           | 0.04     | Race                     | 5.79           | 0.02     |
|                      | Poverty              | 1.27           | 0.26     | Poverty                  | 0.19           | 0.66     |
|                      | Education attainment | 2.31           | 0.32     | Education attainment     | 3.69           | 0.16     |
|                      | Smoking status       | 4.65           | 0.10     | Smoking status           | 5.21           | 0.07     |
|                      | Alcoholic intake     | 1.89           | 0.17     | Alcoholic intake         | <0.01          | 0.99     |
|                      | Physical activity    | 4.63           | 0.03     | Physical activity        | 3.09           | 0.08     |
|                      | Total calories       | 0.23           | 0.63     | Total calories           | 0.51           | 0.48     |
|                      | SBP                  | 0.24           | 0.63     | SBP                      | 0.08           | 0.78     |
|                      | HbA1c                | <0.01          | 0.99     | HbA1c                    | 0.05           | 0.82     |
|                      | Creatinine           | 0.23           | 0.63     | Creatinine               | 0.03           | 0.86     |
| CRP                  | 0.68                 | 0.41           | CRP      | 0.19                     | 0.66           |          |
| Global               | 27.2                 | 0.04           | Global   | 17.4                     | 0.36           |          |

CI= Confidence Interval, CRP: C-reactive protein, HbA1c: glycohemoglobin, HR= Hazard Ratio, SBP: Systolic blood pressure. Model 1 adjusted for age, sex, and race. Model 2 adjusted for model 1 plus poverty, education attainment, smoking status, alcoholic intake, physical activity, and total calories. Model 3 adjusted for model 2 plus SBP, HbA1c, creatinine, and CRP.

Supplementary Table S5 Results of linear regression of serum lycopene on serum CRP.

| Participants                 | Intercept | Coefficient | <i>P</i> value |
|------------------------------|-----------|-------------|----------------|
| All participants             | 0.5493059 | -0.0032329  | <2e-16         |
| Participants without obesity | 0.394882  | -0.0021804  | 3.14e-07       |
| Participants with obesity    | 0.7958880 | -0.0044496  | 2.97e-10       |

Supplementary Table S6 Multifactor COX regressions adjusted for model 3 after removing those who died within 1 year of the survey.

| Participants                 | All-cause mortality  |                | Cardiovascular mortality |                |
|------------------------------|----------------------|----------------|--------------------------|----------------|
|                              | HR (95%CI)           | <i>P</i> value | HR (95%CI)               | <i>P</i> value |
| All participants             | 0.992 (0.987, 0.996) | <0.001         | 0.999 (0.992, 1.007)     | 0.882          |
| Participants without obesity | 0.991 (0.986, 0.996) | <0.001         | 1.001 (0.991, 1.010)     | 0.884          |
| Participants with obesity    | 0.994 (0.986, 1.001) | 0.103          | 0.997 (0.983, 1.011)     | 0.644          |

CI= Confidence Interval, HR= Hazard Ratio, Model 3 adjusted for age, sex, race, poverty, education attainment, smoking status, alcoholic intake, physical activity, total calories, SBP, HbA1c, creatinine, and CRP.



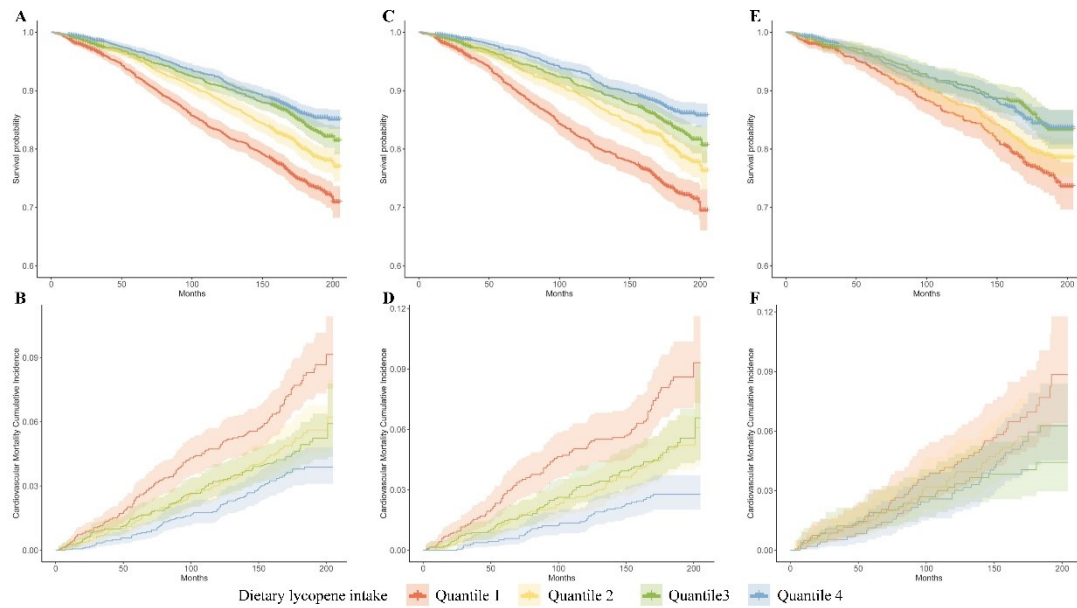

Supplementary Figure S1 Kaplan-Meier curves and cumulative incidence function curves for quartile subgroups of dietary lycopene intake with all-cause mortality and cardiovascular mortality (A) KM curves for dietary lycopene intake and all-cause mortality in all participants,  $P < 0.001$ , (B) CIF curves for dietary lycopene intake and cardiovascular mortality in all participants,  $P < 0.001$ , (C) KM curves for dietary lycopene intake and all-cause mortality in participants without obesity,  $P < 0.001$ , (D) CIF curves for dietary lycopene intake and cardiovascular mortality in participants without obesity,  $P < 0.001$ , (E) KM curves for dietary lycopene intake and all-cause mortality in participants with obesity,  $P < 0.001$ , (F) CIF curves for dietary lycopene intake and cardiovascular mortality in participants with obesity,  $P = 0.1$

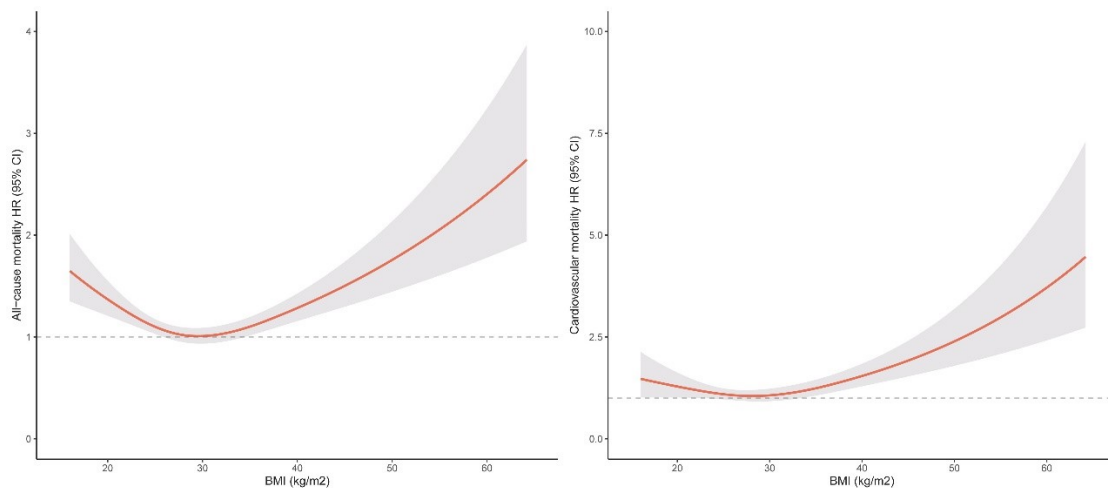

Supplementary Figure S2 Restricted cubic spline analyses of the nonlinear association of BMI with all-cause and cardiovascular mortality.

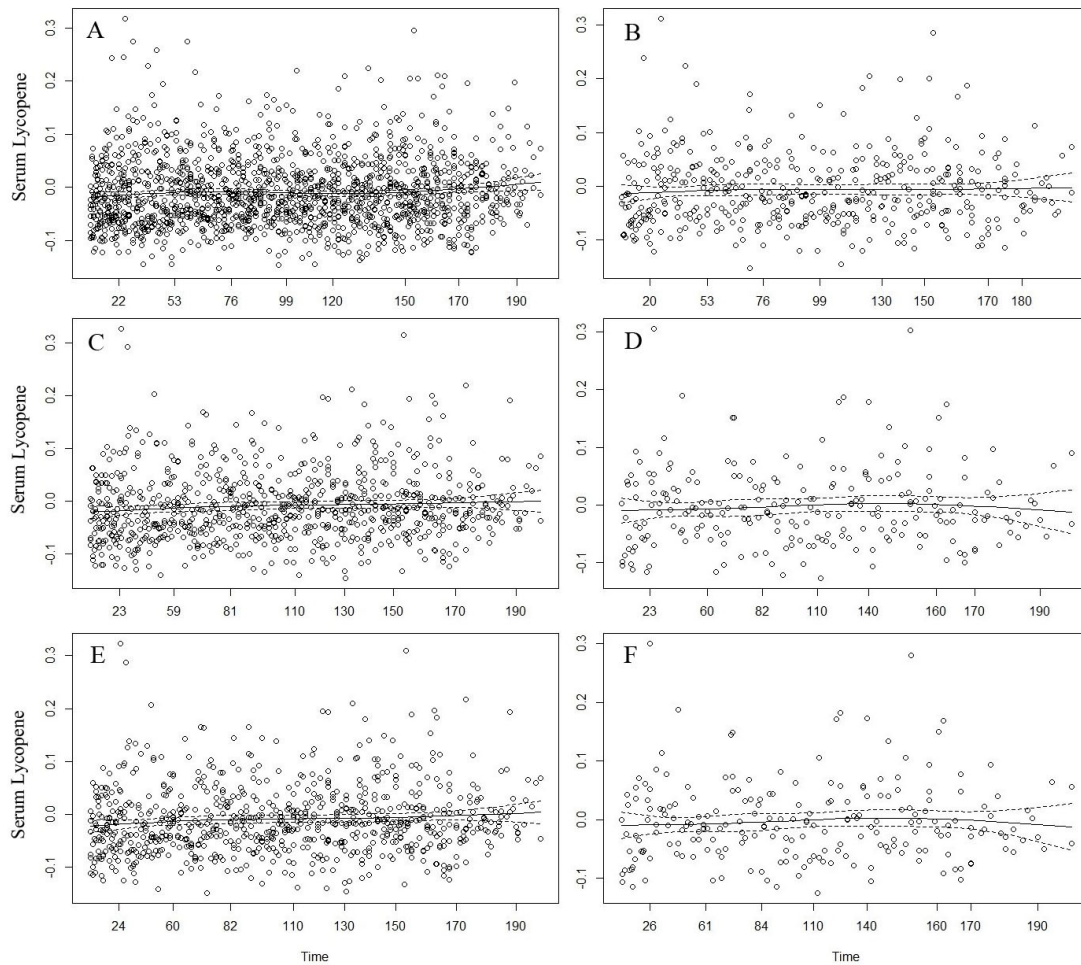

Supplementary Figure S3 Plots of proportional hazards test for three prediction models for all-cause and cardiovascular mortality in all participants

(A) Plot of proportional hazards (PH) test for serum lycopene over time in multifactorial Cox regression for all-cause mortality adjusted for model 1. (B) Plot of PH test for serum lycopene over time in multifactorial Cox regression for cardiovascular mortality adjusted for model 1. (C) Plot of PH test for serum lycopene over time in multifactorial Cox regression for all-cause mortality adjusted for model 2. (D) Plot of PH test for serum lycopene over time in multifactorial Cox regression for cardiovascular mortality adjusted for model 2. (E) Plot of PH test for serum lycopene over time in multifactorial Cox regression for all-cause mortality adjusted for model 3. (F) Plot of PH test for serum lycopene over time in multifactorial Cox regression for cardiovascular mortality adjusted for model 3. Model 1 adjusted for age, sex, and race. Model 2 adjusted for model 1 plus poverty, education attainment, smoking status, alcoholic intake, physical activity, and total calories. Model 3 adjusted for model 2 plus SBP, HbA1c, creatinine, and CRP.

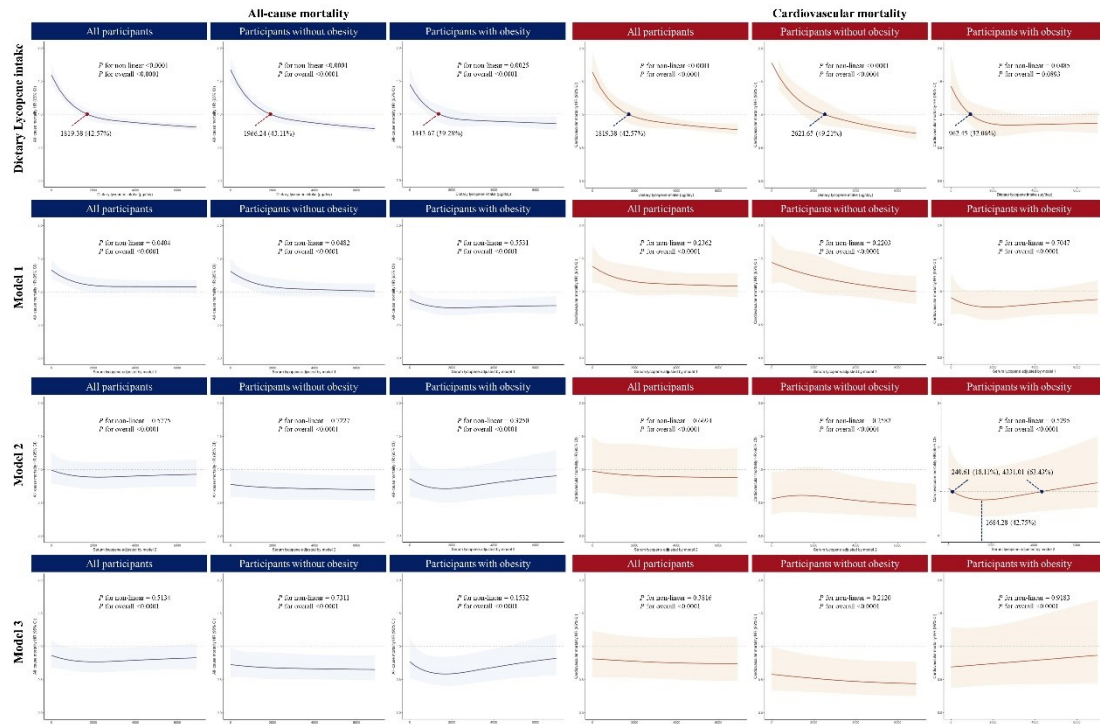

Supplementary Figure S4 Restricted cubic spline analyses of the nonlinear association of dietary lycopene intake with all-cause and cardiovascular mortality.

Model 1 adjusted for age, sex, and race. Model 2 adjusted for model 1 plus poverty, education attainment, smoking status, alcoholic intake, physical activity, and total calories. Model 3 adjusted for model 2 plus SBP, HbA1c, creatinine, and CRP.

| Characteristic                     | All-cause mortality  |         | Cardiovascular mortality |         |
|------------------------------------|----------------------|---------|--------------------------|---------|
|                                    | HR (95% CI)          | P value | HR (95% CI)              | P value |
| Total lycopene adjusted by model 3 |                      |         |                          |         |
| All participants                   | 0.990 (0.986, 0.994) | <0.001  | 0.996 (0.989, 1.004)     | 0.362   |
| Participants without obesity       | 0.989 (0.984, 0.994) | <0.001  | 0.998 (0.989, 1.007)     | 0.653   |
| Participants with obesity          | 0.993 (0.985, 1.000) | 0.062   | 0.994 (0.980, 1.008)     | 0.394   |
| Trans-lycopene adjusted by model 3 |                      |         |                          |         |
| All participants                   | 0.981 (0.974, 0.989) | <0.001  | 0.992 (0.978, 1.006)     | 0.259   |
| Participants without obesity       | 0.979 (0.969, 0.988) | <0.001  | 0.994 (0.976, 1.012)     | 0.498   |
| Participants with obesity          | 0.987 (0.974, 1.001) | 0.067   | 0.988 (0.963, 1.013)     | 0.338   |
| Cis-lycopene adjusted by model 3   |                      |         |                          |         |
| All participants                   | 0.981 (0.973, 0.990) | <0.001  | 0.995 (0.980, 1.011)     | 0.533   |
| Participants without obesity       | 0.981 (0.971, 0.991) | <0.001  | 0.998 (0.989, 1.007)     | 0.653   |
| Participants with obesity          | 0.986 (0.970, 1.001) | 0.074   | 0.998 (0.980, 1.017)     | 0.851   |

Supplementary Figure S5 Multifactorial COX regression results for two conformations of lycopene (trans-lycopene and cis-lycopene) adjusted for model 3.

CI= Confidence Interval, HR= Hazard Ratio, Model 3 adjusted for age, sex, race, poverty, education attainment, smoking status, alcoholic intake, physical activity, total calories, SBP, HbA1c, creatinine, and CRP.
